# Supplementary material for: rMAPS2: an update of the RNA map analysis and plotting server for alternative splicing regulation
Source: PubMed Central journal article supplement — Nucleic Acids Res. 2020 Apr 14;48(W1):W300–6. doi: 10.1093/nar/gkaa237 (PMC7319468; doi:10.1093/nar/gkaa237), 2020-04-14

## Supplementary File

Supplementary Table S1. List of species supported (as of Mar. 2020)

| Species                 | Common Name         | Genome Assembly |
|-------------------------|---------------------|-----------------|
| Homo sapiens            | Human               | hg19            |
|                         |                     | hg38            |
| Mus musculus            | Mouse               | mm10            |
| Rattus norvegicus       | Rat                 | rn6             |
| Drosophila melanogaster | Fruit fly           | dm3             |
|                         |                     | dm6             |
| C. elegans              | Roundworm           | ce11            |
| Danio rerio             | Zebrafish           | danRer10        |
|                         |                     | danRer11        |
| Xenopus laevis          | African clawed frog | xenLae2         |
| Xenopus tropicalis      | Western clawed frog | xenTro9         |
| Oryza sativa            | Rice                | oSa7            |
| Sus scrofa              | Pig                 | susScr11        |
| Gallus gallus           | Chicken             | galGal5         |
|                         |                     | galGal6         |
| Bos taurus              | Cow                 | bosTau9         |
| Arabidopsis thaliana    | Thale cress         | araTha1         |

**Supplementary Table S2. List of RNA-binding proteins (RBPs)**

| Ensembl Gene ID | RBP       | Binding Motif<br>(Regular Expression) | Species      | Protein<br>Domains |
|-----------------|-----------|---------------------------------------|--------------|--------------------|
| ENSG00000115875 | 9G8/SRSF7 | [AT]GGAC[AG]A                         | Homo_sapiens | RRM                |
| ENSG00000148584 | A1CF      | [AT]TAATT[AG]                         | Homo_sapiens | RRM                |
| ENSG00000131503 | ANKHD1    | AGACG[AT][AT]                         | Homo_sapiens | KH                 |
| ENSG00000101489 | BRUNOL4   | [GT]GTGT[GT][GT]                      | Homo_sapiens | RRM                |
| ENSG00000161082 | BRUNOL5   | TGTGT[GT][GT]                         | Homo_sapiens | RRM                |
| ENSG00000140488 | BRUNOL6   | TGTG[AGT][GT]G                        | Homo_sapiens | RRM                |
| ENSG00000080802 | CNOT4     | GACAGA                                | Homo_sapiens | RRM                |
| ENSG00000137449 | CPEB2     | C[ACT]TTTTT                           | Homo_sapiens | RRM                |
| ENSG00000113742 | CPEB4     | TTTTTT                                | Homo_sapiens | RRM                |
| ENSG00000071626 | DAZAP1    | TAG[GT][AT][AT][AG]                   | Homo_sapiens | RRM                |
| ENSG00000120658 | ENOX1     | [ACT][AG][GT]ACAG                     | Homo_sapiens | RRM                |
| ENSG00000104413 | ESRP1     | TGGTGG                                | Homo_sapiens | RRM                |
| ENSG00000103067 | ESRP2     | TGGG[AG]A[AGT]                        | Homo_sapiens | RRM                |
| ENSG00000102081 | FMR1      | [GT]GACA[AG]G                         | Homo_sapiens | KH                 |
| ENSG00000089280 | FUS       | CGCGC                                 | Homo_sapiens | RRM                |
| ENSG00000114416 | FXR1      | A[CT]GAC[AG]                          | Homo_sapiens | KH                 |
| ENSG00000129245 | FXR2      | [AGT]GAC[AG][AG][AG]                  | Homo_sapiens | KH                 |
| ENSG00000138757 | G3BP2     | AGGAT[AGT][AG]                        | Homo_sapiens | RRM                |
| ENSG00000135486 | HNRNPA1   | [AGT]TAGGG[AT]                        | Homo_sapiens | RRM                |
| ENSG00000229887 | HNRNPA1L2 | [AGT]TAGGG[AT]                        | Homo_sapiens | RRM                |
| ENSG00000122566 | HNRNPA2B1 | [AGT]TAGGG[AT]                        | Homo_sapiens | RRM                |
| ENSG00000092199 | HNRNPC    | [ACT]TTTTT[GT]                        | Homo_sapiens | RRM                |
| ENSG00000179172 | HNRNPCL1  | [ACT]TTTTT[GT]                        | Homo_sapiens | RRM                |
| ENSG00000126945 | HNRNPH2   | GGGAGGG                               | Homo_sapiens | RRM                |
| ENSG00000165119 | HNRNPK    | CCA[AT][AC]CC                         | Homo_sapiens | KH                 |
| ENSG00000104824 | HNRNPL    | A[AC]A[CT]A[AC]A                      | Homo_sapiens | RRM                |
| ENSG00000104824 | HNRNPL    | ACAC[AG]A[ACG]                        | Homo_sapiens | RRM                |
| ENSG00000143889 | HNRPLL    | [AG]CA[ACT]ACA                        | Homo_sapiens | RRM                |
| ENSG00000066044 | HuR       | TT[AGT]TTTT                           | Homo_sapiens | RRM                |
| ENSG00000066044 | HuR       | TT[AT]GTTT                            | Homo_sapiens | RRM                |
| ENSG00000066044 | HuR       | TTT[AG][GT]TT                         | Homo_sapiens | RRM                |
| ENSG00000066044 | HuR       | TT[GT][AG]TTT                         | Homo_sapiens | RRM                |
| ENSG00000066044 | HuR       | TTTTTT[GT]                            | Homo_sapiens | RRM                |
| ENSG00000073792 | IGF2BP2   | [ACG][AC]A[ACT][AT]CA                 | Homo_sapiens | KH,RRM             |
| ENSG00000136231 | IGF2BP3   | A[AC]A[ACT][AT]CA                     | Homo_sapiens | KH,RRM             |
| ENSG00000121774 | KHDRBS1   | ATAAAA[ACG]                           | Homo_sapiens | KH                 |
| ENSG00000112232 | KHDRBS2   | [AG]ATAAAA[AC]                        | Homo_sapiens | KH                 |
| ENSG00000131773 | KHDRBS3   | ATAAAA[ACG]                           | Homo_sapiens | KH                 |
| ENSG00000131914 | LIN28A    | [ACT]GGAG[AT]A                        | Homo_sapiens | CSD,Znf            |
| ENSG00000131914 | LIN28A    | [CT]GGAGG[AG]                         | Homo_sapiens | CSD                |
| ENSG00000015479 | MATR3     | [AC]ATCTT[AG]                         | Homo_sapiens | RRM                |
| ENSG00000152601 | MBNL1     | GCTTGC                                | Homo_sapiens | Znf                |
| ENSG00000135097 | MSI1      | TAGT[AT][AG]G                         | Homo_sapiens | RRM                |
| ENSG00000135097 | MSI1      | TAG[GT][AT][AG]G                      | Homo_sapiens | RRM                |
| ENSG00000139910 | NOVA1     | [CT]CA[CT]                            | Homo_sapiens | KH                 |
| ENSG00000070756 | PABPC1    | A[AG]AAAA[AC]                         | Homo_sapiens | RRM                |
| ENSG00000151846 | PABPC3    | [AG]AAAAC[AC]                         | Homo_sapiens | RRM                |
| ENSG00000090621 | PABPC4    | AAAAAA[AG]                            | Homo_sapiens | RRM                |
| ENSG00000174740 | PABPC5    | AGAAA[AGT]T                           | Homo_sapiens | RRM                |
| ENSG00000100836 | PABPN1    | A[AG]AAGA                             | Homo_sapiens | RRM                |

|                 |             |                        |              |         |
|-----------------|-------------|------------------------|--------------|---------|
| ENSG00000169564 | PCBP1       | CC[AT][AT][ACT]CC      | Homo_sapiens | KH      |
| ENSG00000197111 | PCBP2       | CC[CT][CT]CC[ACT]      | Homo_sapiens | KH      |
| ENSG00000148840 | PPRC1       | [GC][GC]GCGC[GC]       | Homo_sapiens | RRM     |
| ENSG00000011304 | PTB/PTBP1   | CTCT[CT][CT]           | Homo_sapiens | RRM     |
| ENSG00000011304 | PTBP1       | [ACT][CT]TTT[CT]T      | Homo_sapiens | RRM     |
| ENSG00000112531 | QKI         | ACTAAC[ACG]            | Homo_sapiens | KH      |
| ENSG00000125970 | RALY        | TTTTTT[CGT]            | Homo_sapiens | RRM     |
| ENSG00000078328 | RBFOX1      | [AT]GCATG[AC]          | Homo_sapiens | RRM     |
| ENSG00000112183 | RBM24       | [AT]G[AT]GTG[AGT]      | Homo_sapiens | RRM     |
| ENSG00000106344 | RBM28       | G[AT]GTAG[AGT]         | Homo_sapiens | RRM     |
| ENSG00000102317 | RBM3        | [AG]A[AGT]AC[GT]A      | Homo_sapiens | RRM     |
| ENSG00000173933 | RBM4        | GCGCG[GC][GC]          | Homo_sapiens | RRM,Znf |
| ENSG00000173933 | RBM4        | GCGCG[GC]G             | Homo_sapiens | RRM,Znf |
| ENSG00000089682 | RBM41       | [AT]TAC[AT]T[GT]       | Homo_sapiens | RRM     |
| ENSG00000126254 | RBM42       | AACTA[AC]G             | Homo_sapiens | RRM     |
| ENSG00000155636 | RBM45       | GACGA[AC][ACG]         | Homo_sapiens | RRM     |
| ENSG00000151962 | RBM46       | [AG]AT[GC]A[AT][AGT]   | Homo_sapiens | RRM     |
| ENSG00000163694 | RBM47       | GATGA[AT]              | Homo_sapiens | RRM     |
| ENSG00000003756 | RBM5        | GA[AG]GG[AT][AG]       | Homo_sapiens | Znf     |
| ENSG00000003756 | RBM5        | [GC]AAGG[AG]G          | Homo_sapiens | RRM     |
| ENSG00000004534 | RBM6        | [ACT]ATCCA[AG]         | Homo_sapiens | RRM     |
| ENSG00000131795 | RBM8A       | [AG][CT]GCGC[CGT]      | Homo_sapiens | RRM     |
| ENSG00000153250 | RBMS1       | [GT]ATATA[GC]          | Homo_sapiens | RRM     |
| ENSG00000144642 | RBMS3       | [AC]TATA[GT][AC]       | Homo_sapiens | RRM     |
| ENSG00000144642 | RBMS3       | [ACT]ATATA             | Homo_sapiens | RRM     |
| ENSG00000020577 | SAMD4A      | GC[GT]GG[ACT][AC]      | Homo_sapiens | SAM     |
| ENSG00000075856 | SART3       | A[AG]AAAA[AC]          | Homo_sapiens | RRM     |
| ENSG00000136450 | SF2/ASF     | [AG]GAAGAAC            | Homo_sapiens | RRM     |
| ENSG00000116560 | SFPQ        | [GT]T[AG][AG]T[GT][GT] | Homo_sapiens | RRM     |
| ENSG00000104852 | SNRNP70     | [AG][AT]TCAAG          | Homo_sapiens | RRM     |
| ENSG00000077312 | SNRPA       | [AT]TGCAC[AG]          | Homo_sapiens | RRM     |
| ENSG00000112081 | SRp20/SRSF3 | [AT]C[AT][AT]C         | Homo_sapiens | RRM     |
| ENSG00000112081 | SRp20/SRSF3 | CTC[GT]TC[CT]          | Homo_sapiens | RRM     |
| ENSG00000100650 | SRp40/SRSF5 | [CT][AG]C[AG][GT][AC]  | Homo_sapiens | RRM     |
| ENSG00000124193 | SRp55/SRSF6 | [CT][CT][AT]C[AT][GC]G | Homo_sapiens | RRM     |
| ENSG00000136450 | SRSF1       | G[AG]AGGA              | Homo_sapiens | RRM     |
| ENSG00000136450 | SRSF1       | GGAGGA                 | Homo_sapiens | RRM     |
| ENSG00000136450 | SRSF1       | GGA[GC]G[AG][ACG]      | Homo_sapiens | RRM     |
| ENSG00000136450 | SRSF1       | AGGA[GC][AC]           | Homo_sapiens | RRM     |
| ENSG00000136450 | SRSF1       | GG[AG]GGA[ACG]         | Homo_sapiens | RRM     |
| ENSG00000188529 | SRSF10      | AGAGA[ACG][AC]         | Homo_sapiens | RRM     |
| ENSG00000188529 | SRSF10      | A[AG]AG[AG][AG][AG]    | Homo_sapiens | RRM     |
| ENSG00000188529 | SRSF10      | AGAGA[AG][AG]          | Homo_sapiens | RRM     |
| ENSG00000188529 | SRSF10      | AGAGA[ACG][ACG]        | Homo_sapiens | RRM     |
| ENSG00000161547 | SRSF2       | GGAG[AT][AGT]          | Homo_sapiens | RRM     |
| ENSG00000115875 | SRSF7       | ACGACG                 | Homo_sapiens | RRM,Znf |
| ENSG00000111786 | SRSF9       | [GT]G[AG][AT]G[GC][AC] | Homo_sapiens | RRM     |
| ENSG00000111786 | SRSF9       | A[GT]GA[ACG][AC][AG]   | Homo_sapiens | RRM     |
| ENSG00000120948 | TARDBP      | GAATG[AGT]             | Homo_sapiens | RRM     |
| ENSG00000116001 | TIA1        | TTTTT[CGT][GT]         | Homo_sapiens | RRM     |
| ENSG00000116001 | TIA1        | [AT]TTTTT[CGT]         | Homo_sapiens | RRM     |
| ENSG00000136527 | Tra2-beta   | GAAAGAA                | Homo_sapiens | RRM     |
| ENSG00000149016 | TUT1        | [AC][AG]ATACT          | Homo_sapiens | RRM,Znf |

|                           |         |                   |              |     |
|---------------------------|---------|-------------------|--------------|-----|
| <b>ENSG00000063244</b>    | U2AF2   | TTTTT[CT]C        | Homo_sapiens | RRM |
| <b>ENSG00000065978</b>    | YBX1    | AACATC            | Homo_sapiens | CSD |
| <b>ENSG00000065978</b>    | YBX1    | AACATC[AGT]       | Homo_sapiens | CSD |
| <b>ENSG0000006047</b>     | YBX2    | AACA[AT]C[AGT]    | Homo_sapiens | CSD |
| <b>ENSG00000135482</b>    | ZC3H10  | [GC][GC]AGCG[AC]  | Homo_sapiens | Znf |
| <b>ENSG00000100722</b>    | ZC3H14  | TTT[AGT]TTT       | Homo_sapiens | Znf |
| <b>ENSG00000139168</b>    | ZCRB1   | G[AG][ACT]TTAA    | Homo_sapiens | RRM |
| <b>ENSG00000075292</b>    | ZNF638  | [CGT]GTT[GC][GT]T | Homo_sapiens | RRM |
| <b>ENSMUSG00000028790</b> | KHDRBS1 | TAAAA[ACG][ACG]   | Mus_musculus | KH  |
| <b>ENSMUSG00000051695</b> | PCBP1   | C[CT]TTCC         | Mus_musculus | KH  |
| <b>ENSMUSG00000001120</b> | PCBP3   | TTT[CT]CC         | Mus_musculus | KH  |
| <b>ENSMUSG00000027510</b> | RBM38   | [GT][GT]GTGT[GT]  | Mus_musculus | RRM |

## Supplementary Figure S1. Plotting motifScore/peakHeight and negative log P values together or separately using “Plot Type” option

rMAPS2 can plot all motifScore/peakHeight together with (A) or separately from (B) the statistical values.

### A. Plotting solid and dashed lines together

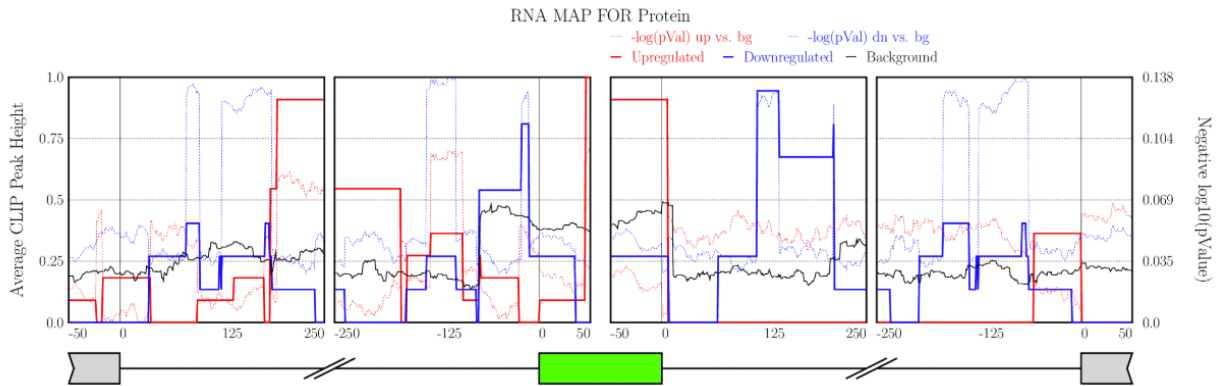

### B. Plotting solid and dashed lines separately

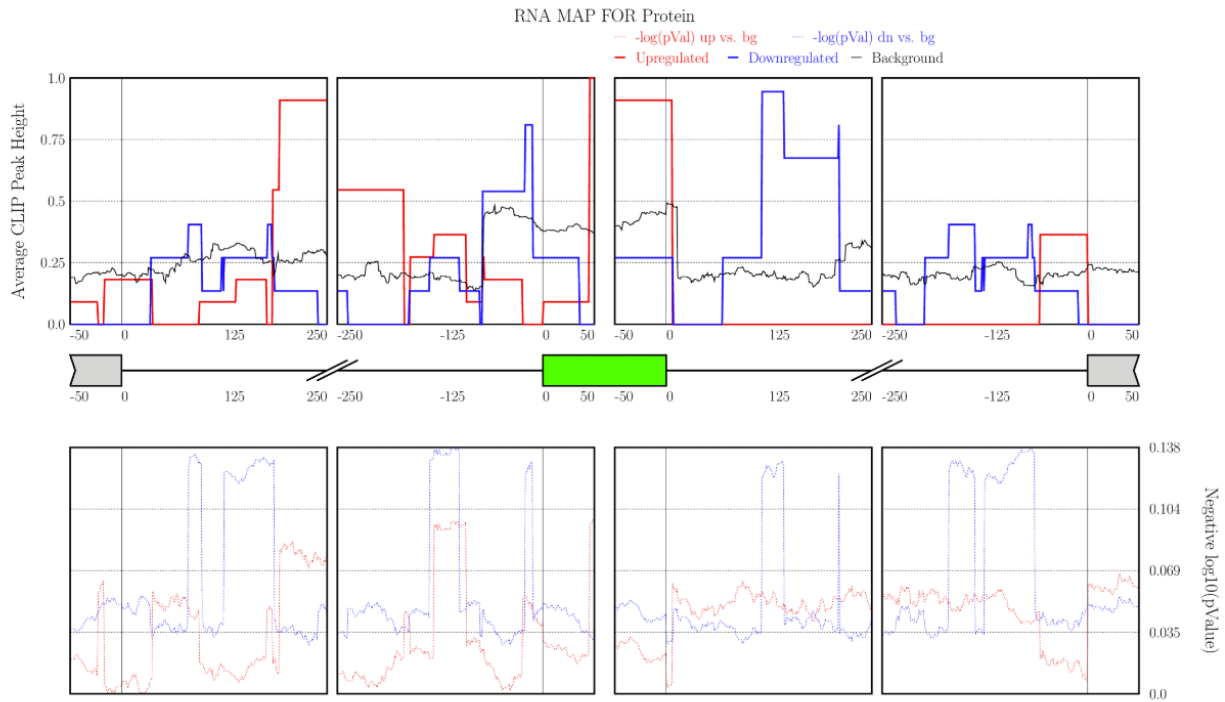

## Supplementary Figure S2. Motif Map analysis result

rMAPS2 RBP motif enrichment analysis results for MXE and A5/3SS events using RNA-seq data. **A.** MXE plot shows enrichment of the PTBP1 motif in the upstream intron of the upregulated first exons (solid red line) and in the downstream intron of the downregulated first exons (solid blue line). **B.** A5SS plot shows enrichment of the BRUNOL6 motif in the downstream intron of downregulated AS regions (solid blue line). **C.** A3SS plot shows enrichment of the ZNF638 motif in the upstream intron of upregulated AS regions (solid red line).

### A. MXE

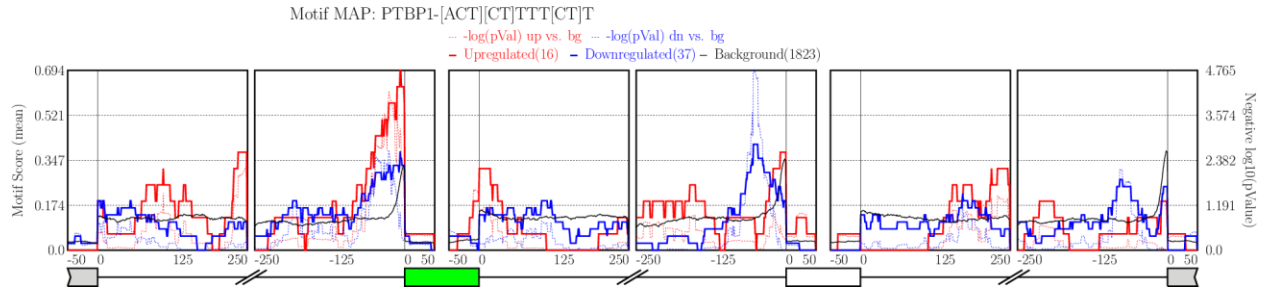

### B. A5SS

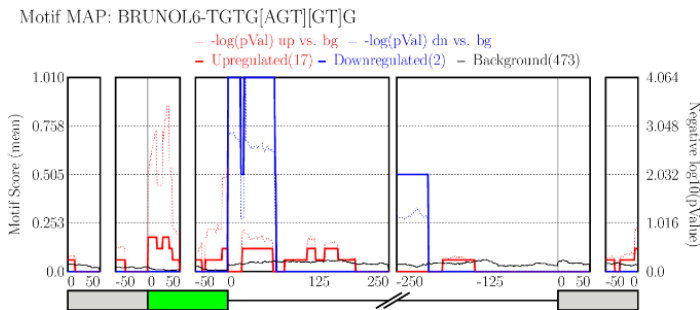

### C. A3SS

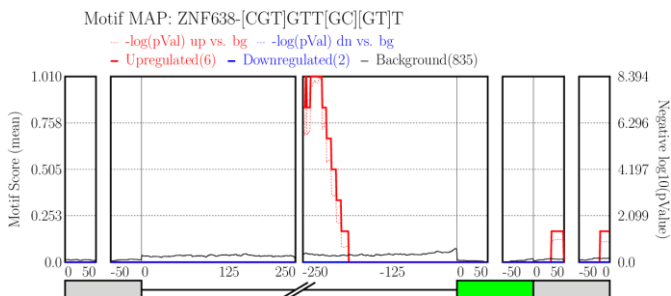

### Supplementary Figure S3. CLIP Map analysis result

rMAPS2 CLIP-seq peak enrichment analysis results for MXE and A5/3SS events using RNA-seq and CLIP-seq datasets. **A-C** plots show CLIP-seq peak distribution over the up/down regulated AS regions. The scale of the second Y-axis (negative  $\log_{10}$  P value) indicates that QKI has no or minimal regulatory role in these three types of AS event.

#### A. MXE

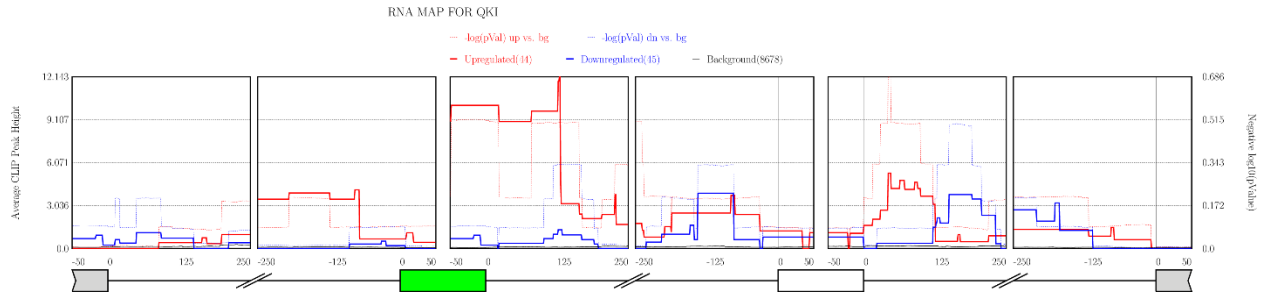

#### B. A5SS

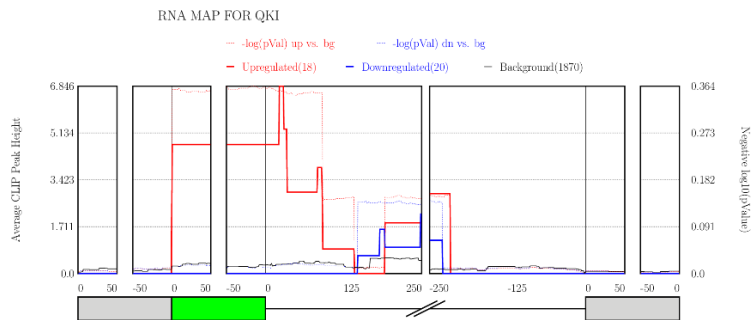

#### C. A3SS

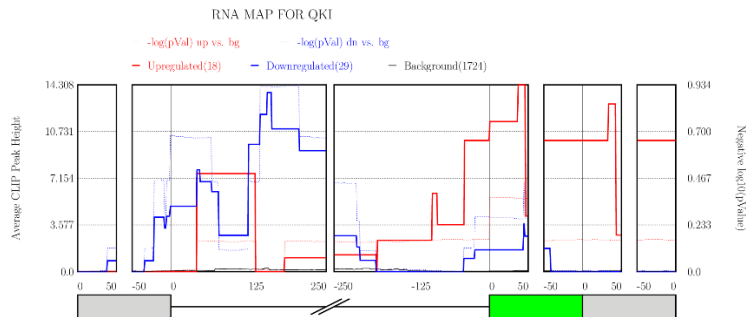

Supplement: gkaa237_supplemental_file.pdf [file gkaa237_supplemental_file.pdf]
